# Supplementary material
Source: PubMed Central journal article supplement (PMC11107153)
Supplement: aem.00418-24-s0001.pdf [file aem.00418-24-s0001.pdf]

1 **Supplementary Files**

2 **Old role with new feature: T2SS ATPase as a cyclic-di-GMP receptor to regulate**  
3 **antibiotic production**

4 Haofei Liu<sup>1</sup>, Gaoge Xu<sup>2,3\*</sup>, Baodian Guo<sup>2</sup>, Fengquan Liu<sup>1,2,4\*</sup>

5 1 College of Plant Protection, Nanjing Agricultural University, Nanjing 210095, China

6 2 Institute of Plant Protection, Jiangsu Academy of Agricultural Sciences, Jiangsu Key  
7 Laboratory for Food Quality and Safety-State Key Laboratory Cultivation Base,  
8 Ministry of Science and Technology, Nanjing 210014, China

9 3 School of Plant Protection, Key Laboratory of Green Prevention and Control of  
10 Tropical Plant Diseases and Pests, Ministry of Education, Hainan University, Haikou,  
11 China

12 4 Department of Plant Pathology, College of Agriculture, Guizhou University, Guiyang  
13 550025, China

14 Haofei Liu and Gaoge Xu contributed equally to this work.

15 \*To whom correspondence should be addressed.

16 **Email addresses**

17 Haofei Liu: a363110lhf@163.com

18 Gaoge Xu\*: gg880712@163.com

19 Baodian Guo : guobd@njau.edu.cn

20 Fengquan Liu\*: fqliu20011@sina.com

21 Content: 3 Tables and 5 Figures

22

**Table S1 Strains and plasmids used in this study**

| <b>Strains and plasmids</b>          | <b>Characteristics<sup>a</sup></b>                         | <b>Source</b>                            |
|--------------------------------------|------------------------------------------------------------|------------------------------------------|
| <b><i>Lysobacter enzymogenes</i></b> |                                                            |                                          |
| OH11                                 | Wild-type , Km <sup>R</sup>                                | Qian et al., 2009                        |
| Δ0328                                | 0328 in-frame deletion mutant                              | This study                               |
| Δ0463                                | 0463 in-frame deletion mutant                              | This study                               |
| Δ0770 (Δ <i>lspE</i> )               | 0770 in-frame deletion mutant                              | This study                               |
| Δ1020                                | 1020 in-frame deletion mutant                              | This study                               |
| Δ1499                                | 1499 in-frame deletion mutant                              | This study                               |
| Δ1886                                | 1886 in-frame deletion mutant                              | This study                               |
| Δ1890                                | 1890 in-frame deletion mutant                              | This study                               |
| Δ2394                                | 2394 in-frame deletion mutant                              | This study                               |
| Δ2512                                | 2512 in-frame deletion mutant                              | This study                               |
| Δ3049                                | 3049 in-frame deletion mutant                              | This study                               |
| Δ3194                                | 3194 in-frame deletion mutant                              | This study                               |
| Δ3810                                | 3810 in-frame deletion mutant                              | This study                               |
| Δ4096                                | 4096 in-frame deletion mutant                              | This study                               |
| Δ5095                                | 5095 in-frame deletion mutant                              | This study                               |
| OH11 <sub>LspE-R298A</sub>           | <i>lspE</i> site-directed mutation mutant                  | This study                               |
| OH11 <sub>LspE-R313A</sub>           | <i>lspE</i> site-directed mutation mutant                  | This study                               |
| OH11 <sub>LspE-R424A</sub>           | <i>lspE</i> site-directed mutation mutant                  | This study                               |
| OH11 <sub>LspE-R457A</sub>           | <i>lspE</i> site-directed mutation mutant                  | This study                               |
| OH11 <sub>LspE-R358A</sub>           | <i>lspE</i> site-directed mutation mutant                  | This study                               |
| OH11 <sub>LspE-R359A</sub>           | <i>lspE</i> site-directed mutation mutant                  | This study                               |
| <b><i>Escherichia coli</i></b>       |                                                            |                                          |
| Trans1-T1                            | Host strain for plasmid amplification                      | TransGen Biotech Company, Beijing, China |
| BL21(DE3)                            | Host strain for protein expression, Km <sup>R</sup>        | TaKaRa Company, Shanghai, China          |
| <b>Plasmids</b>                      |                                                            |                                          |
| pEX18GM                              | Suicide vector for gene in-frame deletion, Gm <sup>R</sup> | Hoang et al., 1998                       |

|                                     |                                                                            |                                 |
|-------------------------------------|----------------------------------------------------------------------------|---------------------------------|
| 0328-pEX18                          | Plasmid for in-frame deletion of 0328                                      | This study                      |
| 0463-pEX18                          | Plasmid for in-frame deletion of 0463                                      | This study                      |
| 0770-pEX18                          | Plasmid for in-frame deletion of 0770                                      | This study                      |
| 1020-pEX18                          | Plasmid for in-frame deletion of 1020                                      | This study                      |
| 1499-pEX18                          | Plasmid for in-frame deletion of 1499                                      | This study                      |
| 1886-pEX18                          | Plasmid for in-frame deletion of 1886                                      | This study                      |
| 1890-pEX18                          | Plasmid for in-frame deletion of 1890                                      | This study                      |
| 2394- pEX18                         | Plasmid for in-frame deletion of 2394                                      | This study                      |
| 2512-pEX18                          | Plasmid for in-frame deletion of 2512                                      | This study                      |
| 3049-pEX18                          | Plasmid for in-frame deletion of 3049                                      | This study                      |
| 3194-pEX18                          | Plasmid for in-frame deletion of 3194                                      | This study                      |
| 3810-pEX18                          | Plasmid for in-frame deletion of 3810                                      | This study                      |
| 4096-pEX18                          | Plasmid for in-frame deletion of 4096                                      | This study                      |
| 5095-pEX18                          | Plasmid for in-frame deletion of 5095                                      | This study                      |
| <i>lspE</i> <sub>R298A</sub> -pEX18 | Plasmid for site-directed mutation of <i>lspE</i>                          | This study                      |
| <i>lspE</i> <sub>R313A</sub> -pEX18 | Plasmid for site-directed mutation of <i>lspE</i>                          | This study                      |
| <i>lspE</i> <sub>R424A</sub> -pEX18 | Plasmid for site-directed mutation of <i>lspE</i>                          | This study                      |
| <i>lspE</i> <sub>R457A</sub> -pEX18 | Plasmid for site-directed mutation of <i>lspE</i>                          | This study                      |
| <i>lspE</i> <sub>K358A</sub> -pEX18 | Plasmid for site-directed mutation of <i>lspE</i>                          | This study                      |
| <i>lspE</i> <sub>T359A</sub> -pEX18 | Plasmid for site-directed mutation of <i>lspE</i>                          | This study                      |
| pET30a(+)                           | Vector for expression His-tag fusion protein                               | TaKaRa company, Shanghai, China |
| LspE-pET30a                         | Plasmid for fusion protein expression of LspE and His-tag                  | This study                      |
| LspE <sub>R298A</sub> -pET30a       | Plasmid for fusion protein expression of LspE <sub>R298A</sub> and His-tag | This study                      |
| LspE <sub>R313A</sub> -pET30a       | Plasmid for fusion protein expression of LspE <sub>R313A</sub> and His-tag | This study                      |
| LspE <sub>R424A</sub> -pET30a       | Plasmid for fusion protein expression of LspE <sub>R424A</sub> and His-tag | This study                      |
| LspE <sub>R457A</sub> -pET30a       | Plasmid for fusion protein expression of LspE <sub>R457A</sub> and His-tag | This study                      |
| LspE <sub>K358A</sub> -pET30a       | Plasmid for fusion protein expression of LspE <sub>K358A</sub> and His-tag | This study                      |
| LspE <sub>T359A</sub> -pET30a       | Plasmid for fusion protein expression of                                   | This study                      |

|                                    |                                                                                   |            |
|------------------------------------|-----------------------------------------------------------------------------------|------------|
|                                    | LspE <sub>T359A</sub> and His-tag                                                 |            |
| LspE-Hcp1-pET30a                   | Plasmid for fusion protein expression of LspE, Hcp1 and His-tag                   | This study |
| LspE <sub>R298A</sub> -Hcp1-pET30a | Plasmid for fusion protein expression of LspE <sub>R298A</sub> , Hcp1 and His-tag | This study |
| LspE <sub>R313A</sub> -Hcp1-pET30a | Plasmid for fusion protein expression of LspE <sub>R313A</sub> , Hcp1 and His-tag | This study |

24 <sup>a</sup>Km<sup>R</sup>, Gm<sup>R</sup> represent kanamycin and gentamicin resistance, respectively.

25

**Table S2 Primers used in this study**

| <b>Primer</b>                                  | <b>Sequence<sup>a</sup></b>                          | <b>Purpose</b>                                                 |
|------------------------------------------------|------------------------------------------------------|----------------------------------------------------------------|
| <b>Primers used for gene in-frame deletion</b> |                                                      |                                                                |
| 0328F1                                         | GGCCAGTGCCAAGCTTTTCGATCCCGCAAGAACTCG<br>CGCCAATG     | To amplify a 524-bp upstream<br>homologue arm of <i>0328</i>   |
| 0328R1                                         | GGGCTCAGCACTGTTTGGCCTTGATCGCGGAACG                   |                                                                |
| 0328F2                                         | AACAGTGCTGAGCCCCGGGCTCCGATTCC                        | To amplify a 523-bp downstream<br>homologue arm of <i>0328</i> |
| 0328R2                                         | CCGGGGATCCTCTAGATTTCTGCGATTGCGGGAATT<br>CGGTC        |                                                                |
| 0463F1                                         | ATTGAGCTCGGTACCGCGGGAAGGATAGAGGAAT                   | To amplify a 442-bp upstream<br>homologue arm of <i>0463</i>   |
| 0463R1                                         | GTCCATCGCCGCCACGAGAAGATGTAGTCGCTGAGCT                |                                                                |
| 0463F2                                         | CGACTACATCTTCTCGTGGCGGCGATGGACGAA                    | To amplify a 398-bp downstream<br>homologue arm of <i>0463</i> |
| 0463R2                                         | CGACGGCCAGTGCCAGTTCACCACCACCCACTTG                   |                                                                |
| 0770F1                                         | GGCCAGTGCCAAGCTTGCCGTCCGAGGCATGCGTGC<br>GTCCGCGCTCGC | To amplify a 524-bp upstream<br>homologue arm of <i>0770</i>   |
| 0770R1                                         | ACTGGGTGTGAAAGGGCTGTTGCATGGCCTCGTGCTG<br>CTGTG       |                                                                |
| 0770F2                                         | CCTTTCACACCCAGTTGCGGGTGACTCC                         | To amplify a 523-bp downstream<br>homologue arm of <i>0770</i> |
| 0770R2                                         | CCGGGGATCCTCTAGAACC GCGCCACGGCCGCGCGG<br>ATG         |                                                                |
| 1020F1                                         | GGCCAGTGCCAAGCTTCGCCAGGTCGTCGATGCGGA<br>CCA          | To amplify a 524-bp upstream<br>homologue arm of <i>1020</i>   |
| 1020R1                                         | CGTACTCACATGTCTAAAGTTCCGAATGATGGAAGAA<br>C           |                                                                |
| 1020F2                                         | AGACATGTGAGTACGGTAGATCGGCGCGGGTC                     | To amplify a 523-bp downstream<br>homologue arm of <i>1020</i> |
| 1020R2                                         | CCGGGGATCCTCTAGACGTCAACGTCTTCGCGCCAGC<br>C           |                                                                |
| 1499F1                                         | ATTGAGCTCGGTACCGCTATGGCTGACGCTGTT                    | To amplify a 352-bp upstream<br>homologue arm of <i>1499</i>   |
| 1499R1                                         | TGTTGCCGTAGATGTCGAGCCTCCACCAACGC                     |                                                                |
| 1499F2                                         | TTGGTGGAAGGCTCGACATCTACGGCAACAACAGTTT<br>C           | To amplify a 264-bp downstream<br>homologue arm of <i>1499</i> |
| 1499R2                                         | CGACGGCCAGTGCCACAGTTCGCCCTCGTGCTC                    |                                                                |
| 1886F1                                         | GGCCAGTGCCAAGCTTCGCGCTTCGACGGCGCCGAC                 | To amplify a 524-bp upstream<br>homologue arm of <i>1886</i>   |
| 1886R1                                         | CAGCCATGTGAGGGCCGCTTTGGAGGCATT                       |                                                                |
| 1886F2                                         | GCCCTCACATGGCTGTATCACGCCGCGAGT                       | To amplify a 523-bp downstream                                 |

|        |                                                   |                                                                |
|--------|---------------------------------------------------|----------------------------------------------------------------|
| 1886R2 | CCGGGGATCCTCTAGAGTCGCGCGCCTGGAAACGGT<br>CC        | homologue arm of <i>1886</i>                                   |
| 1890F1 | GGCCAGTGCCAAGCTTGCCCGGCGCGATCGCGTCA<br>TCAC       | To amplify a 524-bp upstream<br>homologue arm of <i>1890</i>   |
| 1890R1 | GCACGGCGCACCGCGGAATCGCAGCCGGCGCTGGG               |                                                                |
| 1890F2 | CGCGGTGCGCCGTGCGCGCCGCCGCGTTGGCCGGA<br>CTG        | To amplify a 530-bp downstream<br>homologue arm of <i>1890</i> |
| 1890R2 | CCGGGGATCCTCTAGAGCTGGTGCACGGTGCGGTAG<br>CTCTCGATC |                                                                |
| 2394F1 | ATGACCATGATTACGCGCCTTCGTCTGGGTGGT                 | To amplify a 319-bp upstream<br>homologue arm of <i>2394</i>   |
| 2394R1 | GTAGAACAGCGGGATGCCGCCGAGCATCACCA                  |                                                                |
| 2394F2 | GTGATGCTCGGCGGCATCCCGCTGTTCTACCTGCT               | To amplify a 490-bp downstream<br>homologue arm of <i>2394</i> |
| 2394R2 | AGGATCCCCGGGTACCGATGGAGATGTTGCCGTC                |                                                                |
| 2512F1 | GGCCAGTGCCAAGCTTCAGACCCAATGGCGCGGGCC<br>GGTG      | To amplify a 524-bp upstream<br>homologue arm of <i>2512</i>   |
| 2512R1 | CCGGCTCACATCGCGCGCTGACCGCTGCGGCGAAC               |                                                                |
| 2512F2 | AGCGCGCGATGTGAGCCGGCCGCGCCGCGCTCAGTG<br>CAC       | To amplify a 523-bp downstream<br>homologue arm of <i>2512</i> |
| 2512R2 | CCGGGGATCCTCTAGAGATCACCGGCTTCCGCATGCG             |                                                                |
| 3049F1 | GGCCAGTGCCAAGCTTCGTTTATCCAGCGCGTTGAG              | To amplify a 524-bp upstream<br>homologue arm of <i>3049</i>   |
| 3049R1 | TTCCCATGTGACCGGATGTCGCGCCTGC                      |                                                                |
| 3049F2 | ACATCGGCGTCACATGGGAACGGCGCGCCCGGGGCG<br>CGTCG     | To amplify a 523-bp downstream<br>homologue arm of <i>3049</i> |
| 3049R2 | CCGGGGATCCTCTAGACGAGTCCGACTTCGACAAGG<br>C         |                                                                |
| 3194F1 | ATGACCATGATTACGGGCGACGAAGGCTGGTG                  | To amplify a 520-bp upstream<br>homologue arm of <i>3194</i>   |
| 3194R1 | CGCCGCACCCCCTCACACGAGAGCTATCGGCTCA                |                                                                |
| 3194F2 | CCGATAGCTCTCGTGTGAGGGGTGCGGCGAT                   | To amplify a 284-bp downstream<br>homologue arm of <i>3194</i> |
| 3194R2 | AGGATCCCCGGGTACCGACAGCAAGACGGGCGA                 |                                                                |
| 3810F1 | GGCCAGTGCCAAGCTTGTCGGCCAGGCGGCT                   | To amplify a 524-bp upstream<br>homologue arm of <i>3810</i>   |
| 3810R1 | GCCCCGTGTGAGCAACGGCAACGAACGCACGCCCGG<br>CAG       |                                                                |
| 3810F2 | TTGCTCACACGGGGCTGGTGGTTGGGT                       | To amplify a 523-bp downstream<br>homologue arm of <i>3810</i> |
| 3810R2 | CCGGGGATCCTCTAGACCCAAGAGCGAAGCCTGGTT<br>CG        |                                                                |
| 4096F1 | ATGACCATGATTACGATCTGCTCGTTCGTCGGC                 | To amplify a 501-bp upstream                                   |

|                                            |                                                    |                                                             |
|--------------------------------------------|----------------------------------------------------|-------------------------------------------------------------|
| 4096R1                                     | GCGGATCGTTGTCGTAGCCAGTCCTCAGTTTCGGTAT              | homologue arm of <i>4096</i>                                |
| 4096F2                                     | AACTGAGGACTGGCTACGACAACGATCCGCTGAG                 | To amplify a 358-bp downstream homologue arm of <i>4096</i> |
| 4096R2                                     | AGGATCCCCGGGTACCGGAGGCGGGCATGGA                    |                                                             |
| 5095F1                                     | GGCCAGTGCCAAGCTTGGGCCCTAGGCTCGAATCGC               | To amplify a 524-bp upstream homologue arm of <i>5095</i>   |
| 5095R1                                     | CTGGGTCACATCAGGGCATCGGCTTGGG                       |                                                             |
| 5095F2                                     | CCTGATGTGACCCAGGACCACGCCCCGATGCC                   | To amplify a 523-bp downstream homologue arm of <i>5095</i> |
| 5095R2                                     | CCGGGGATCCTCTAGAGGTAACGGGTTCCCGTCCAGG              |                                                             |
| <b>Primers used for protein expression</b> |                                                    |                                                             |
| LspE-His-F                                 | AGAAGGAGATATACATATGAATGCGCAGGAGCGTGA<br>TGT        | To amplify a 1788-bp fragment encoding LspE                 |
| LspE-His-R                                 | TCGAGTGCGGCCGCAAGCTTTGCGTCTCGGTCACCC               |                                                             |
| LspE-Hcp1-His-F1                           | AGAAGGAGATATACATATGAATGCGCAGGAGCGTGAT<br>GT        | To amplify a 1782-bp upstream homologue arm of LspE--Hcp1   |
| LspE-Hcp1-His-R1                           | GAACATATCAACAGCCCCACTCGCCAACCTTTGCGTC<br>CTCGGTCAC |                                                             |
| LspE-Hcp1-His-F2                           | GTGACCGAGGACGCAAAGTTGGCGAGTGGGGCTGTTGA<br>TATGTTC  | To amplify a 483-bp downstream homologue arm of LspE-Hcp1   |
| LspE-Hcp1-His-R2                           | TCGAGTGCGGCCGCAAGCTTGGCCTGCACGTTCTGG<br>C          |                                                             |
| <b>Primers used for qRT-PCR</b>            |                                                    |                                                             |
| Pks-F                                      | ACTATTTGTTGGGCGACGAC                               | To detect the transcript level of <i>pks</i>                |
| Pks-R                                      | GTAACCGAACAGGGTGCAAT                               |                                                             |
| 16s-F                                      | ACGGTCGCAAGACTGAAACT                               | Reference gene                                              |
| 16s-R                                      | AAGGCACCAATCCATCTCTG                               |                                                             |

27

28

29  
30

**Table S3 Circular dichroism spectroscopy results of the protein structure**

| (%)    | LspE-Hcp1 | LspE <sub>K358A</sub> -Hcp1 | LspE <sub>T359A</sub> -Hcp1 |
|--------|-----------|-----------------------------|-----------------------------|
| Helix  | 14.7      | 13.3                        | 15.1                        |
| Beta   | 49.2      | 49.2                        | 48.0                        |
| Turn   | 13.5      | 14.7                        | 14.8                        |
| Random | 22.6      | 22.8                        | 22.1                        |

31  
32

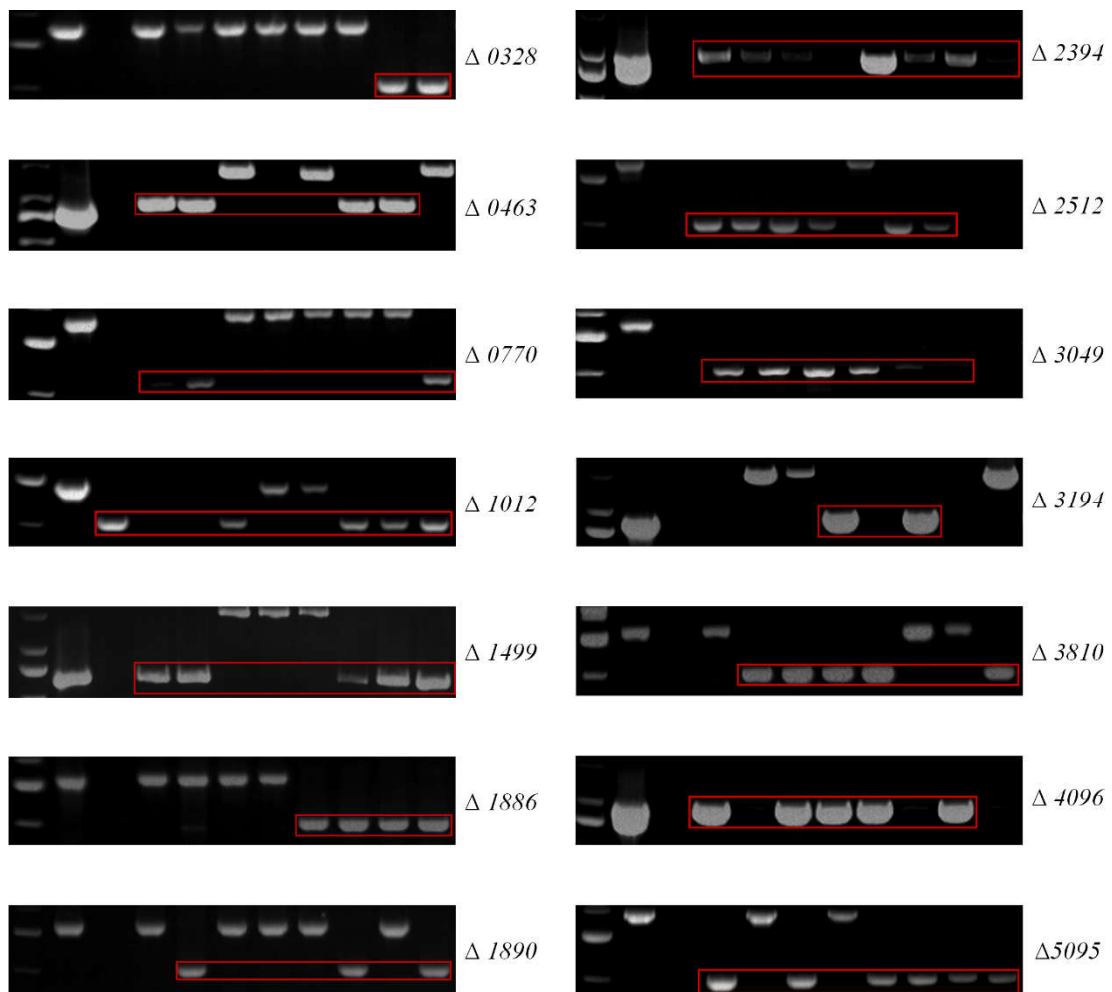

33

34 **Figure S1.** Mutants confirmation by PCR in this study. Red box indicated the expected size

35 from deletion mutant amplified by selected primers, respectively.



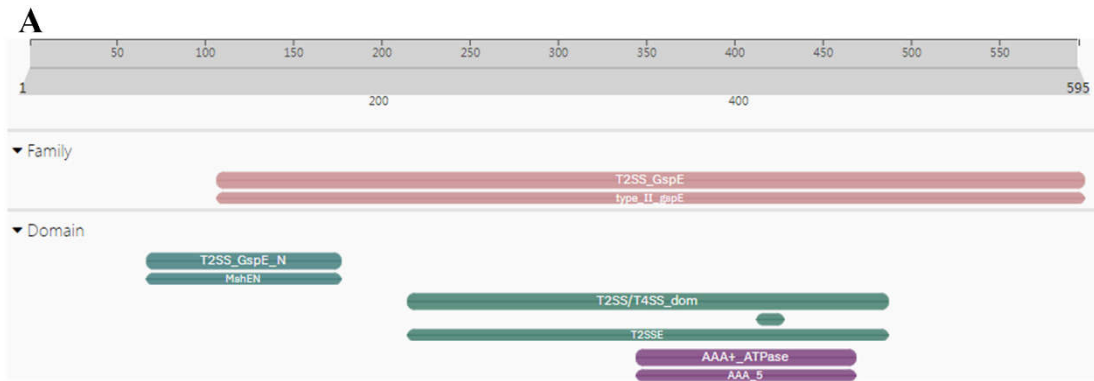

**B**

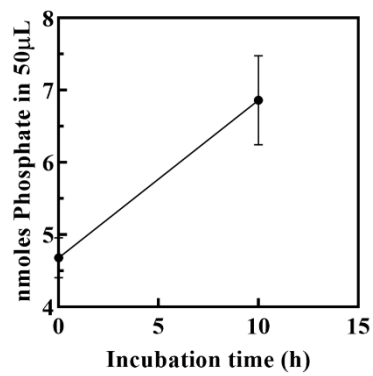

36

37 **Figure S2.** (A) The amino acid sequence of LspE shows homology to the ATPase GspE of

38 T2SS, as indicated by the alignment with the Pfam database. (B) *In vitro* ATPase activity assay

39 of LspE-His showed negative result.

40

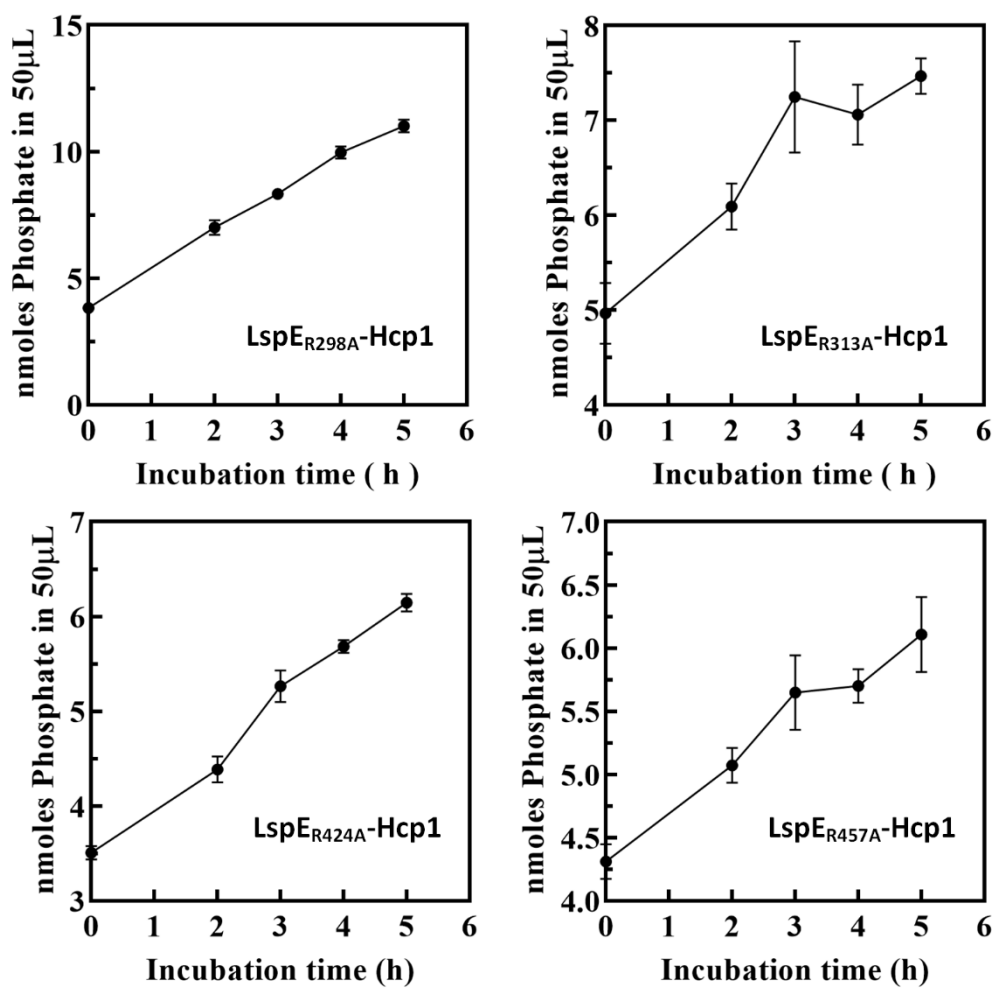

41

42 **Figure S3.** *In vitro* ATPase activity assay of LspE<sub>R298A</sub>-Hcp1, LspE<sub>R313A</sub>-Hcp1, LspE<sub>R424A</sub>-Hcp1

43 and LspE<sub>R313A</sub>-Hcp1 showed negative results.

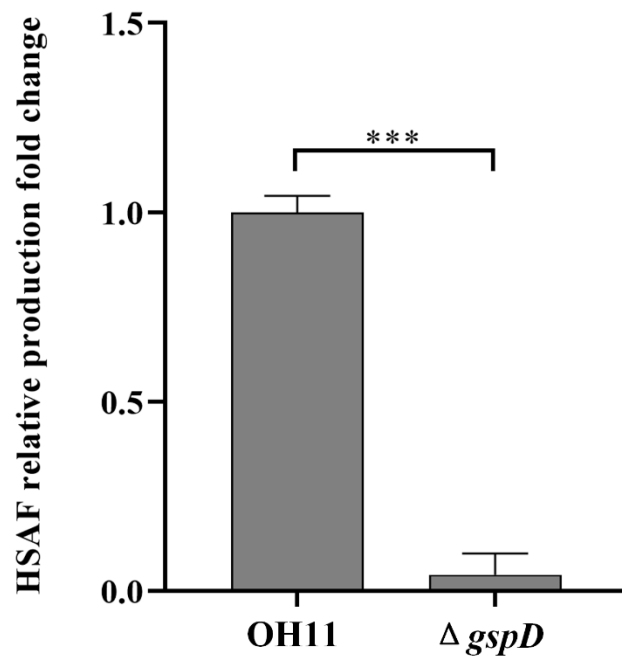

44

45 **Figure S4.** HSAF production detection. Statistical comparisons were performed with  
 46 GraphPad software (GraphPad, La Jolla, CA) using t-test. The error bars indicate  
 47 standard errors. \*\*\*P<0.001, relative to the wild-type OH11. Biological experiments  
 48 for each treatment were performed three times and assayed in triplicate.

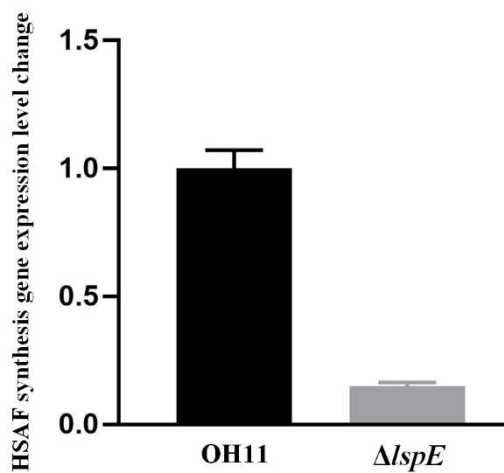

49 **Figure S5.** HSAF biosynthesis gene expression level detected by qRT-PCR.

50

51

52 **References**

- 53 Hoang, T.T., Karkhoff-Schweizer, R.R., Kutchma, A.J., and Schweizer, H.P. 1998. A broad-  
54 host-range Flp-FRT recombination system for site-specific excision of chromosomally-  
55 located DNA sequences: application for isolation of unmarked *Pseudomonas aeruginosa*  
56 mutants. *Gene* 212: 77-78.
- 57 Qian, G. L., Hu, B. S., Jiang, Y. H. and Liu, F. Q. 2009. Identification and characterization of  
58 *Lysobacter enzymogenes* as a biological control agent against some fungal pathogens.  
59 *Agricultural sciences in China* 8(1):68-75
